# Supplementary material for: Coadsorption-dependent orientation of fibronectin epitopes at hydrophilic gold surfaces
Source: Royal Society of Chemistry journal article supplement (doi:10.1039/c2sm25490e), 2012-01-01
Supplement: c2sm25490e.pdf [file c2sm25490e.pdf]

## Supplementary Information

The data set employed for PCA analysis of the two proteins included only the amino acid peaks whose characteristic molecular fragment for the two proteins are summarized in Table 1. PCA loadings (not shown here in details) were consistent with the total amino acid composition of Fn and HSA, and allowed to distinguish the proteins on the basis of their overall amino acid composition. Furthermore, Table 1 shows also that the relative amino acid abundances allow to discriminate among the three Fn modules I-III.

**Table 1.** The relative abundance of various amino acids (%) is reported for HSA, and for Fn as well as for each of the three Fn epitopes (Type I, Type II and Type III).

| Amino acid | Fragments                                                                                                                                                                                                                                                                                   | HSA   | Fn    | Fn Type I | Fn Type II | Fn Type III |
|------------|---------------------------------------------------------------------------------------------------------------------------------------------------------------------------------------------------------------------------------------------------------------------------------------------|-------|-------|-----------|------------|-------------|
| Ala        | C <sub>2</sub> H <sub>6</sub> N                                                                                                                                                                                                                                                             | 10.34 | 3.62  | 1.73      | 2.00       | 4.94        |
| Cys        | C <sub>2</sub> H <sub>6</sub> NS                                                                                                                                                                                                                                                            | 5.91  | 2.96  | 9.62      | 8.00       | 0.14        |
| Asp        | C <sub>3</sub> H <sub>6</sub> NO <sub>2</sub>                                                                                                                                                                                                                                               | 5.91  | 5.25  | 6.54      | 7.00       | 4.67        |
| Glu        | C <sub>4</sub> H <sub>6</sub> NO;<br>C <sub>4</sub> H <sub>8</sub> NO <sub>2</sub>                                                                                                                                                                                                          | 10.02 | 5.30  | 5.96      | 4.00       | 5.99        |
| Phe        | C <sub>8</sub> H <sub>10</sub> N;<br>C <sub>9</sub> H <sub>8</sub> O                                                                                                                                                                                                                        | 5.91  | 2.85  | 2.31      | 7.00       | 1.81        |
| Gly        | CH <sub>4</sub> N                                                                                                                                                                                                                                                                           | 2.63  | 8.25  | 13.46     | 8.00       | 6.41        |
| His        | C <sub>4</sub> H <sub>5</sub> N <sub>2</sub> ;<br>C <sub>4</sub> H <sub>6</sub> N <sub>2</sub> ;<br>C <sub>5</sub> H <sub>8</sub> N <sub>3</sub>                                                                                                                                            | 2.63  | 3.03  | 3.46      | 4.00       | 1.32        |
| Ile        | C <sub>3</sub> H <sub>12</sub> N                                                                                                                                                                                                                                                            | 1.48  | 4.76  | 3.65      | 0.00       | 5.78        |
| Lys        | C <sub>5</sub> H <sub>10</sub> N                                                                                                                                                                                                                                                            | 9.85  | 3.18  | 4.62      | 3.00       | 3.20        |
| Leu        | C <sub>5</sub> H <sub>12</sub> N                                                                                                                                                                                                                                                            | 10.51 | 5.50  | 3.27      | 4.00       | 6.20        |
| Met        | C <sub>2</sub> H <sub>5</sub> S                                                                                                                                                                                                                                                             | 1.15  | 1.20  | 2.69      | 2.00       | 0.49        |
| Asn        | C <sub>3</sub> H <sub>4</sub> NO;<br>C <sub>3</sub> H <sub>7</sub> N <sub>2</sub> O;<br>C <sub>3</sub> H <sub>6</sub> NO <sub>2</sub> ;<br>C <sub>4</sub> H <sub>4</sub> NO <sub>2</sub>                                                                                                    | 2.79  | 4.61  | 4.62      | 9.00       | 3.62        |
| Pro        | C <sub>4</sub> H <sub>6</sub> N;<br>C <sub>4</sub> H <sub>8</sub> N                                                                                                                                                                                                                         | 3.94  | 8.58  | 1.92      | 4.00       | 9.54        |
| Gln        | C <sub>4</sub> H <sub>6</sub> NO                                                                                                                                                                                                                                                            | 3.28  | 4.58  | 5.00      | 5.00       | 4.74        |
| Arg        | CH <sub>3</sub> N <sub>2</sub> ;<br>C <sub>2</sub> H <sub>7</sub> N <sub>3</sub> ;<br>C <sub>4</sub> H <sub>10</sub> N <sub>3</sub> ;<br>C <sub>4</sub> H <sub>11</sub> N <sub>3</sub> ;<br>C <sub>5</sub> H <sub>8</sub> N <sub>3</sub> ;<br>C <sub>5</sub> H <sub>11</sub> N <sub>4</sub> | 4.11  | 5.59  | 6.35      | 4.00       | 4.94        |
| Ser        | C <sub>2</sub> H <sub>6</sub> NO;<br>C <sub>3</sub> H <sub>5</sub> O <sub>2</sub>                                                                                                                                                                                                           | 4.60  | 6.90  | 4.62      | 7.00       | 9.47        |
| Thr        | C <sub>4</sub> H <sub>5</sub> O;<br>C <sub>3</sub> H <sub>8</sub> NO                                                                                                                                                                                                                        | 4.76  | 11.04 | 7.31      | 12.00      | 11.70       |
| Val        | C <sub>4</sub> H <sub>10</sub> N;<br>C <sub>5</sub> H <sub>7</sub> O <sup>+</sup>                                                                                                                                                                                                           | 6.90  | 6.68  | 4.04      | 1.00       | 10.03       |
| Trp        | C <sub>9</sub> H <sub>8</sub> N                                                                                                                                                                                                                                                             | 0.33  | 1.52  | 3.65      | 2          | 1.25        |
| Tyr        | C <sub>7</sub> H <sub>7</sub> O                                                                                                                                                                                                                                                             | 2.96  | 4.60  | 5.19      | 7          | 3.76        |
